# Supplementary material for: Facile synthesis of carbon–NiCoO2 composite microspheres with pitaya-type structure and their application in supercapacitors
Source: Royal Society of Chemistry journal article supplement (doi:10.1039/c6ra19113d), 2016-01-01
Supplement: c6ra19113d1.pdf [file c6ra19113d1.pdf]

## Supporting Information

### **Facile synthesis of carbon-NiCoO<sub>2</sub> composite microspheres with pitaya-type structure and their application in supercapacitors**

Yongchao Ma<sup>a</sup>, Ping Liu<sup>a</sup>, Qingzhi Liu<sup>a</sup>, Zhiwei Chen<sup>b</sup>, Dan Qu<sup>a</sup>, Jinsheng Shi<sup>a\*</sup>

<sup>a</sup>Qingdao Agricultural University, Qingdao 266109, People's Republic of China

<sup>b</sup>School of Life Sciences, Shandong University of Technology, Zibo 255049, People's

Republic of China

\*E-mail: [jsshqn@aliyun.com](mailto:jsshqn@aliyun.com);

Tel: +86-532-88030161, Fax: +86-532-86080213

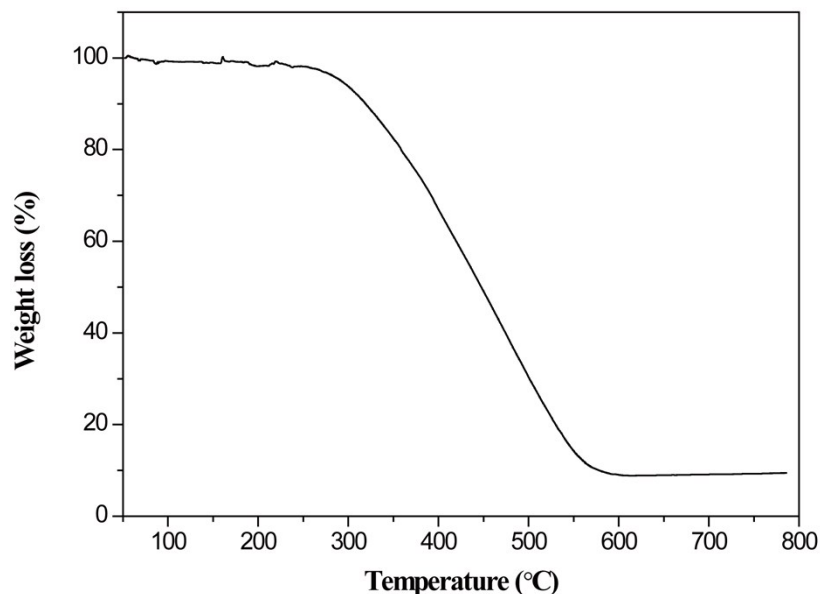

**Fig. S1** TG curve of the as-prepared NiCo-precursor composites.

The TG curve (Fig. S1) showed that there were three distinct weight loss stages from room temperature to 800 °C. The first weight loss of ~10 % for the precursor below 250 °C may be attributed to the removal of adsorbed water as well as densification of composite spheres. The main weight loss of ~85% for the precursor happened between 250 and 600 °C corresponding to the oxidation of the carbon templates. Further increasing the temperature to 800 °C, no distinct weight loss was detected. Thus, the mass ratio of between the carbon template and NiCoO<sub>2</sub> was estimated to be 17:1. In the present work, a calcination temperature of 600 °C was used to partially remove the carbon template, similar to the previous reports.
